# Supplementary material
Source: PubMed Central journal article supplement (PMC5503479)
Supplement: NIHMS873995-supplement-1.pdf [file NIHMS873995-supplement-1.pdf]

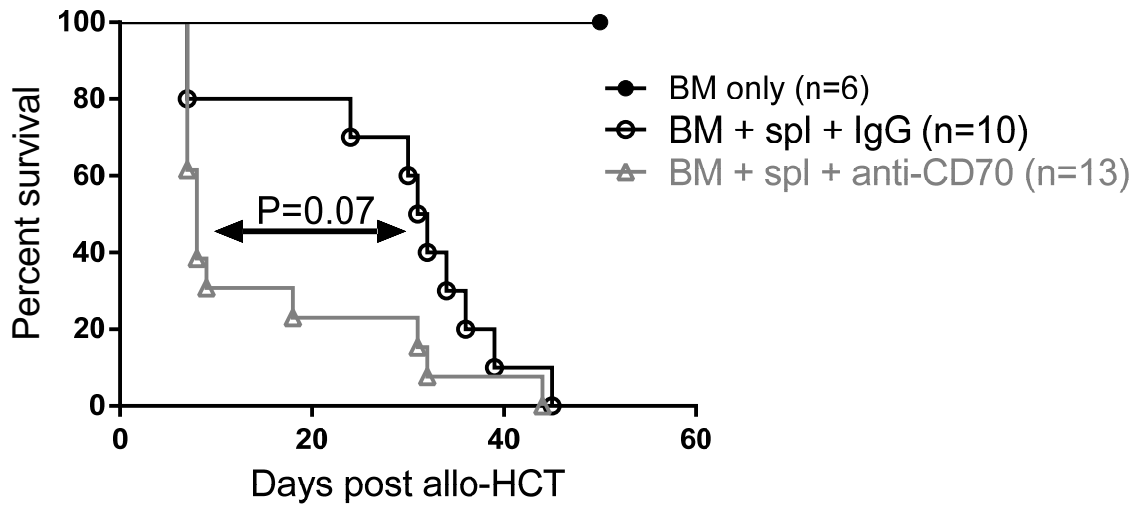

**Supplemental Figure 1. Blockade of CD70 exacerbates GVHD.** Lethally irradiated BALB/c mice were transplanted with  $2 \times 10^6$  BM and  $5 \times 10^6$  total splenocytes harvested from C57BL/6 donor mice. The host mice were then treated with  $250 \mu\text{g}$  of anti-CD70 or IgG control at days 0, 2, 4, and 6 after transplant and monitored for survival. Summary results are combined from 2 independent experiments, with statistical significance evaluated by log rank (Mantel-Cox) test.

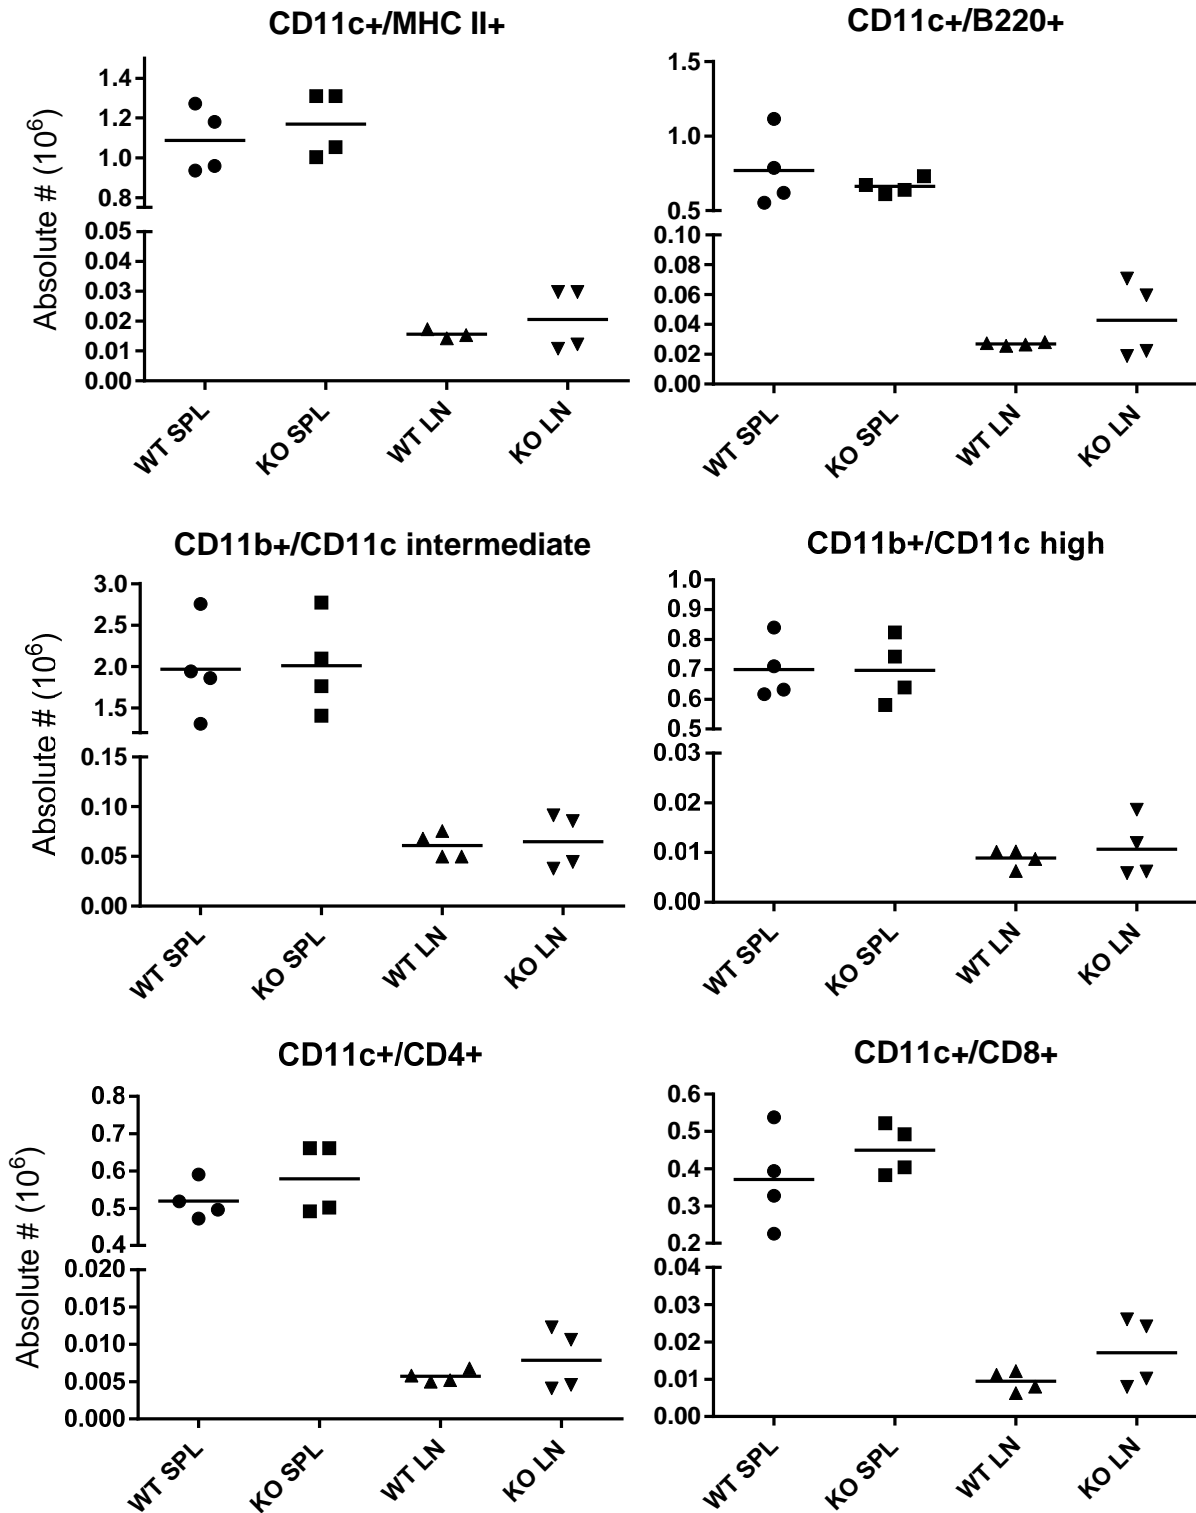

**Supplemental Figure 2. Dendritic cell number and subset composition are not affected by CD70 deficiency.** Total cells were harvested from the spleens (SPL) and lymph nodes (LN) of age- and gender-matched C57BL/6 WT and CD70 knockout (KO) mice (n=4 for each genotype). Flow cytometry was performed to analyze dendritic cell subsets based on the expression of CD11c, MHC II, B220, CD11b, CD4 and CD8. Absolute number of each subset was acquired by multiplying the frequency of the subset to the total number of cells harvested.
